# Supplementary material for: Direct transformation of 2-acetylpyridine oxime esters into α-oxygenated imines in an Ir(iii) complex
Source: Royal Society of Chemistry journal article supplement (doi:10.1039/c7dt02528a), 2017-01-01
Supplement: c7dt02528a1.pdf [file c7dt02528a1.pdf]

## *Electronic Supplementary Information*

# **Direct transformation of 2-acetylpyridine oxime esters into $\alpha$ -oxygenated imines in an Ir(III) complex**

Hiroyuki Takahashi, Shintaro Kodama,\* and Youichi Ishii\*

*Department of Applied Chemistry, Faculty of Science and Engineering, Chuo University, 1-13-27 Kasuga, Bunkyo-ku, Tokyo 112-8551, Japan*

## ***Contents***

|                                                                                                                                             |     |
|---------------------------------------------------------------------------------------------------------------------------------------------|-----|
| <b>General considerations</b>                                                                                                               | S2  |
| <b>Transformation of 1 into 2</b>                                                                                                           | S2  |
| <b>Synthesis of 2aBF<sub>4</sub></b>                                                                                                        | S4  |
| <b>Synthesis of 4Cl</b>                                                                                                                     | S5  |
| <b>Fig. S1. ESI-MS spectrum (positive ion mode) for the reaction mixture in Scheme 3 (A crossover experiment).</b>                          | S6  |
| <b>X-ray diffraction studies</b>                                                                                                            | S7  |
| <b>Table S1. X-ray crystallographic data for 2aBF<sub>4</sub> and 4Cl.</b>                                                                  | S8  |
| <b>Fig. S2. <sup>1</sup>H NMR (CD<sub>2</sub>Cl<sub>2</sub>) spectrum of 2aCl.</b>                                                          | S9  |
| <b>Fig. S3. <sup>1</sup>H NMR (CDCl<sub>3</sub>) spectrum of 2bCl.</b>                                                                      | S10 |
| <b>Fig. S4. <sup>1</sup>H NMR (CDCl<sub>3</sub>) spectrum of 2dCl.</b>                                                                      | S11 |
| <b>Fig. S5. <sup>1</sup>H NMR (CDCl<sub>3</sub>) spectrum of 2eCl.</b>                                                                      | S12 |
| <b>Fig. S6. <sup>1</sup>H NMR (CDCl<sub>3</sub>) spectrum of 2fCl.</b>                                                                      | S13 |
| <b>Fig. S7. <sup>1</sup>H NMR (CD<sub>2</sub>Cl<sub>2</sub>) spectrum of 2aBF<sub>4</sub>.</b>                                              | S14 |
| <b>Fig. S8. <sup>1</sup>H NMR (CDCl<sub>3</sub>) spectrum of 4Cl.</b>                                                                       | S15 |
| <b>Fig. S9. Full <sup>1</sup>H NMR (CD<sub>2</sub>Cl<sub>2</sub>-D<sub>2</sub>O) spectrum of 4Cl.</b>                                       | S16 |
| <b>Fig. S10. Full <sup>1</sup>H NMR (CD<sub>2</sub>Cl<sub>2</sub>-D<sub>2</sub>O-NEt<sub>3</sub>) spectrum of 4Cl-<i>d</i><sub>3</sub>.</b> | S16 |
| <b>References</b>                                                                                                                           | S17 |

## General considerations

All experimental manipulations for air and water sensitive reagents were carried out in dried glass vessels under an argon or a nitrogen atmosphere by standard Schlenk techniques. Dichloromethane was distilled over  $P_4O_{10}$ ; methanol was distilled over Mg. They were degassed and stored under an argon atmosphere. The other solvents (anhydrous grade) were purchased from Sigma-Aldrich and purged with argon before use.  $^1H$  (500 MHz) and  $^{13}C\{^1H\}$  (126 MHz) NMR spectra were recorded on a JEOL ECA-500 spectrometer. Chemical shifts are reported in  $\delta$ , referenced to residual  $^1H$  and  $^{13}C$  signals of deuterated solvents as internal standards. IR spectra were recorded on a JASCO FT/IR-4200 spectrometer using KBr pellets. Elemental analyses were performed on a Perkin Elmer 2400 series II CHN analyzer.

## Transformation of 1 into 2

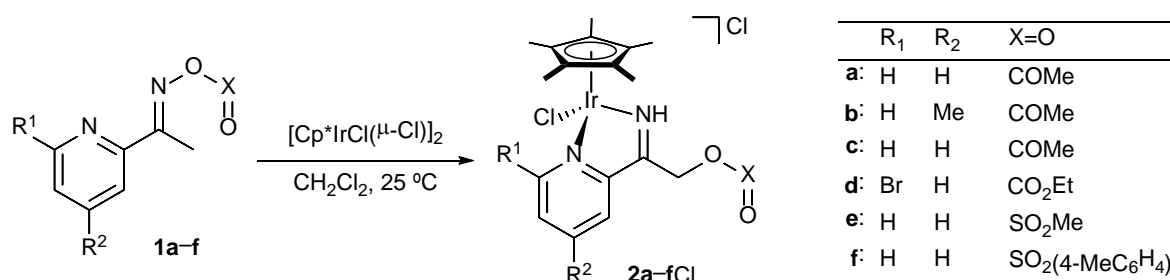

## General procedure

A mixture of  $[Cp^*IrCl(\mu-Cl)]_2$  and oxime ester **1** in dichloromethane was stirred at 25 °C for an appropriate reaction time (3–6 h). After the completion of the reaction, the mixture was filtered through a Celite pad, and the filtrate was concentrated in vacuo. The crude product was purified by recrystallization from dichloromethane–hexane or dichloromethane–methanol–diethyl ether to give **2Cl**.

**Synthesis of 2aCl:** This compound was obtained from [Cp\*IrCl( $\mu$ -Cl)]<sub>2</sub> (31.9 mg, 0.040 mmol) and oxime acetate **1a** (14.4 mg, 0.081 mmol) according to *general procedure*. The reaction time was 3 h. The product was purified by recrystallization from dichloromethane–hexane. Dark red crystals (38.2 mg, 83% yield). <sup>1</sup>H NMR (CD<sub>2</sub>Cl<sub>2</sub>)  $\delta$  15.7 (br s, 1H), 8.78 (d,  $J$  = 6.0 Hz, 1H), 8.06 (m, 2H), 7.73 (m, 1H), 5.88 (d,  $J$  = 14 Hz, 1H), 5.61 (d,  $J$  = 14 Hz, 1H), 2.13 (s, 3H), 1.89 (s, 15H); <sup>13</sup>C{<sup>1</sup>H} NMR (CD<sub>2</sub>Cl<sub>2</sub>)  $\delta$  174.4, 170.3, 155.5, 151.8, 140.1, 129.7, 127.7, 90.8, 61.9, 21.0, 9.49; IR (KBr, cm<sup>-1</sup>) 1750 ( $\nu_{C=O}$ ), 1598 ( $\nu_{C=N}$ ), 1235 ( $\nu_{C-O}$ ); Anal. Calcd for C<sub>19</sub>H<sub>25</sub>Cl<sub>2</sub>IrN<sub>2</sub>O<sub>2</sub>: C, 39.58; H, 4.37; N, 4.86. Found: C, 39.33; H, 4.45; N, 4.72.

**Synthesis of 2bCl:** This compound was obtained from [Cp\*IrCl( $\mu$ -Cl)]<sub>2</sub> (59.6 mg, 0.075 mmol) and oxime acetate **1b** (39.4 mg, 0.205 mmol) according to *general procedure*. The reaction time was 3 h. The product was purified by recrystallization from dichloromethane–methanol–diethyl ether. Dark red crystals (43.6 mg, 49% yield). <sup>1</sup>H NMR (CDCl<sub>3</sub>)  $\delta$  15.2 (br s, 1H), 8.63 (d,  $J$  = 6.0 Hz, 1H), 7.82 (s, 1H), 7.57 (dd,  $J$  = 6.0, 1.0 Hz, 1H), 5.88 (d,  $J$  = 14 Hz, 1H), 5.61 (d,  $J$  = 14 Hz, 1H), 2.63 (s, 3H), 2.12 (s, 3H), 1.90 (s, 15H); <sup>13</sup>C{<sup>1</sup>H} NMR (CDCl<sub>3</sub>)  $\delta$  174.4, 170.1, 154.9, 152.7, 150.8, 130.3, 128.2, 90.3, 61.5, 21.7, 21.0, 9.53; IR (KBr, cm<sup>-1</sup>) 1749 ( $\nu_{C=O}$ ), 1622 ( $\nu_{C=N}$ ), 1225 ( $\nu_{C-O}$ ); Anal. Calcd for C<sub>20</sub>H<sub>27</sub>Cl<sub>2</sub>IrN<sub>2</sub>O<sub>2</sub>: C, 40.68; H, 4.61; N, 4.74. Found: C, 40.44; H, 4.59; N, 4.61.

**Synthesis of 2dCl:** This compound was obtained from [Cp\*IrCl( $\mu$ -Cl)]<sub>2</sub> (15.8 mg, 0.020 mmol) and oxime carbonate **1d** (9.6 mg, 0.046 mmol) according to *general procedure*. The reaction time was 3 h. The product was purified by recrystallization from dichloromethane–methanol–diethyl ether. Orange crystals (15.6 mg, 65% yield). <sup>1</sup>H NMR (CDCl<sub>3</sub>)  $\delta$  15.5 (br s, 1H), 8.78 (d,  $J$  = 5.0 Hz, 1H), 8.11 (d,  $J$  = 7.0 Hz, 1H), 8.06 (td,  $J$  = 7.8, 1.4 Hz, 1H), 7.74 (ddd,  $J$  = 7.3, 5.9, 1.4 Hz, 1H), 6.15 (d,  $J$  = 14 Hz, 1H), 5.54 (d,  $J$  = 14 Hz, 1H), 4.23 (q,  $J$  = 7.0 Hz, 2H), 1.91 (s, 15H), 1.30 (t,  $J$  = 7.0 Hz, 3H); <sup>13</sup>C{<sup>1</sup>H} NMR (CDCl<sub>3</sub>)  $\delta$  173.6, 155.1, 153.9, 151.6, 140.0, 129.8, 127.7, 90.6, 65.3, 64.9, 14.3, 9.53; IR (KBr, cm<sup>-1</sup>) 1755 ( $\nu_{C=O}$ ), 1600 ( $\nu_{C=N}$ ), 1260 ( $\nu_{C-O}$ ); Anal. Calcd for C<sub>20</sub>H<sub>27</sub>Cl<sub>2</sub>IrN<sub>2</sub>O<sub>3</sub>: C, 39.60; H, 4.49; N, 4.62. Found: C, 39.23; H, 4.24; N, 4.53.

**Synthesis of 2eCl:** This compound was obtained from  $[\text{Cp}^*\text{IrCl}(\mu\text{-Cl})]_2$  (31.4 mg, 0.039 mmol) and oxime sulfonate **1e** (18.2 mg, 0.085 mmol) according to *general procedure*. The reaction time was 6 h. The product was purified by recrystallization from dichloromethane–methanol–diethyl ether. Orange crystals (40.5 mg, 84% yield).  $^1\text{H}$  NMR ( $\text{CDCl}_3$ )  $\delta$  14.4 (br s, 1H), 8.79 (d,  $J = 4.5$  Hz, 1H), 8.25 (d,  $J = 7.5$  Hz, 1H), 8.13 (td,  $J = 7.8, 1.2$  Hz, 1H), 7.79 (ddd,  $J = 7.3, 5.6, 1.6$  Hz, 1H), 5.28 (d,  $J = 13$  Hz, 1H), 5.10 (d,  $J = 13$  Hz, 1H), 2.84 (s, 3H), 1.87 (s, 15H);  $^{13}\text{C}\{^1\text{H}\}$  NMR ( $\text{CDCl}_3$ )  $\delta$  174.8, 154.6, 151.6, 140.0, 129.7, 128.2, 90.6, 39.9, 39.6, 9.28; IR (KBr,  $\text{cm}^{-1}$ ) 1599 ( $\nu_{\text{C=N}}$ ), 1187 ( $\nu_{\text{S=O}}$ ); Anal. Calcd for  $\text{C}_{18}\text{H}_{25}\text{Cl}_2\text{IrN}_2\text{O}_3\text{S}$ : C, 35.29; H, 4.11; N, 4.57 Found: C, 35.33; H, 4.01; N, 4.53.

**Synthesis of 2fCl:** This compound was obtained from  $[\text{Cp}^*\text{IrCl}(\mu\text{-Cl})]_2$  (62.9 mg, 0.079 mmol) and oxime sulfonate **1f** (60.8 mg, 0.209 mmol) according to *general procedure*. The reaction time was 6 h. The product was purified by precipitation from dichloromethane–methanol–diethyl ether. Red oil (52.4 mg, 48% yield).  $^1\text{H}$  NMR ( $\text{CDCl}_3$ )  $\delta$  14.3 (br s, 1H), 8.78 (d,  $J = 5.0$  Hz, 1H), 8.23 (d,  $J = 7.0$  Hz, 1H), 8.09 (t,  $J = 7.3$ , 1H), 7.81 (d,  $J = 8.0$  Hz, 2H), 7.77 (m, 1H), 7.16 (d,  $J = 8.0$  Hz, 2H), 5.27 (d,  $J = 13$  Hz, 1H), 5.10 (d,  $J = 13$  Hz, 1H), 2.35 (s, 3H), 1.83 (s, 15H);  $^{13}\text{C}\{^1\text{H}\}$  NMR ( $\text{CDCl}_3$ )  $\delta$  175.2, 154.3, 151.8, 142.5, 140.1, 140.1, 130.0, 128.9, 128.4, 126.3, 90.6, 39.8, 21.5, 9.27; IR (KBr,  $\text{cm}^{-1}$ ) 1600 ( $\nu_{\text{C=N}}$ ), 1184 ( $\nu_{\text{S=O}}$ ); Anal. Calcd for  $\text{C}_{24}\text{H}_{29}\text{Cl}_2\text{IrN}_2\text{O}_3\text{S}$ : C, 41.86; H, 4.24; N, 4.07. Found: C, 41.47; H, 4.25; N, 4.14.

### Synthesis of 2aBF<sub>4</sub>

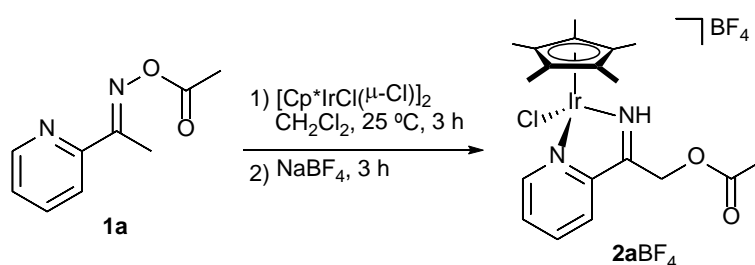

A mixture of  $[\text{Cp}^*\text{IrCl}(\mu\text{-Cl})]_2$  (31.9 mg, 0.040 mmol) and oxime acetate **1a** (15.1 mg, 0.085 mmol) in dichloromethane (7 mL) was stirred at 25 °C for 3 h.  $\text{NaBF}_4$  (11.0 mg, 0.100 mmol) was added to the resulting mixture and stirred for additional 3 h. Then, the mixture was filtered through a Celite pad, and the filtrate was concentrated in vacuo. The crude product was purified by recrystallization from dichloromethane–methanol–diethyl ether to give **2aBF<sub>4</sub>** as orange crystals (31.0 mg, 62% yield).  $^1\text{H}$  NMR ( $\text{CD}_2\text{Cl}_2$ )  $\delta$  11.6 (br s, 1H), 8.82 (d,  $J$  = 5.5 Hz, 1H), 8.16 (td,  $J$  = 7.6, 1.2 Hz, 1H), 8.10 (br d,  $J$  = 7.5 Hz, 1H), 7.83 (ddd,  $J$  = 7.3, 5.8, 1.5 Hz, 1H), 5.53 (d,  $J$  = 16 Hz, 1H), 5.44 (d,  $J$  = 17 Hz, 1H), 2.25 (s, 3H), 1.82 (s, 15H);  $^{13}\text{C}\{^1\text{H}\}$  NMR ( $\text{CD}_2\text{Cl}_2$ )  $\delta$  176.0, 170.1, 154.0, 152.2, 140.5, 130.8, 127.9, 90.8, 62.9, 20.8, 9.13; IR (KBr,  $\text{cm}^{-1}$ ) 1751 ( $\nu_{\text{C=O}}$ ), 1600 ( $\nu_{\text{C=N}}$ ), 1234 ( $\nu_{\text{C-O}}$ ), 1084 ( $\nu_{\text{B-F}}$ ); Anal. Calcd for  $\text{C}_{19}\text{H}_{25}\text{BClF}_4\text{IrN}_2\text{O}_2$ : C, 36.35; H, 4.01; N, 4.46. Found: C, 36.46; H, 3.86; N, 4.44.

### Synthesis of **4Cl**

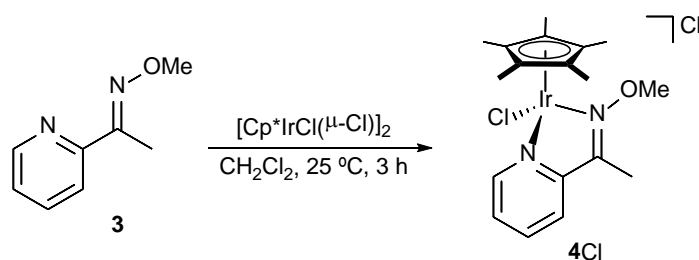

A mixture of  $[\text{Cp}^*\text{IrCl}(\mu\text{-Cl})]_2$  (47.8 mg, 0.060 mmol) and oxime ether **3** (18.9 mg, 0.126 mmol) in dichloromethane was stirred at 25 °C for 3 h. After the completion of the reaction, the mixture was concentrated in vacuo. The crude product was purified by recrystallization from dichloromethane–methanol–diethyl ether to give **4Cl** as orange crystals (48.8 mg, 74% yield).  $^1\text{H}$  NMR ( $\text{CDCl}_3$ )  $\delta$  8.84 (d,  $J$  = 4.5 Hz, 1H), 8.62 (d,  $J$  = 8.0 Hz, 1H), 8.27 (t,  $J$  = 7.5 Hz, 1H), 7.93 (t,  $J$  = 6.3 Hz, 1H), 3.95 (s, 3H), 2.98 (s, 3H), 1.80 (s, 15H);  $^{13}\text{C}\{^1\text{H}\}$  NMR ( $\text{CDCl}_3$ )  $\delta$  171.6, 153.2, 151.8, 141.0, 130.5, 129.2, 90.8, 63.3, 14.5, 9.14; IR (KBr,  $\text{cm}^{-1}$ ) 1610 ( $\nu_{\text{C=N}}$ ); Anal. Calcd for  $\text{C}_{18}\text{H}_{25}\text{Cl}_2\text{IrN}_2\text{O}$ : C, 39.41; H, 4.59; N, 5.11. Found: C, 39.31; H, 4.68; N, 4.83.

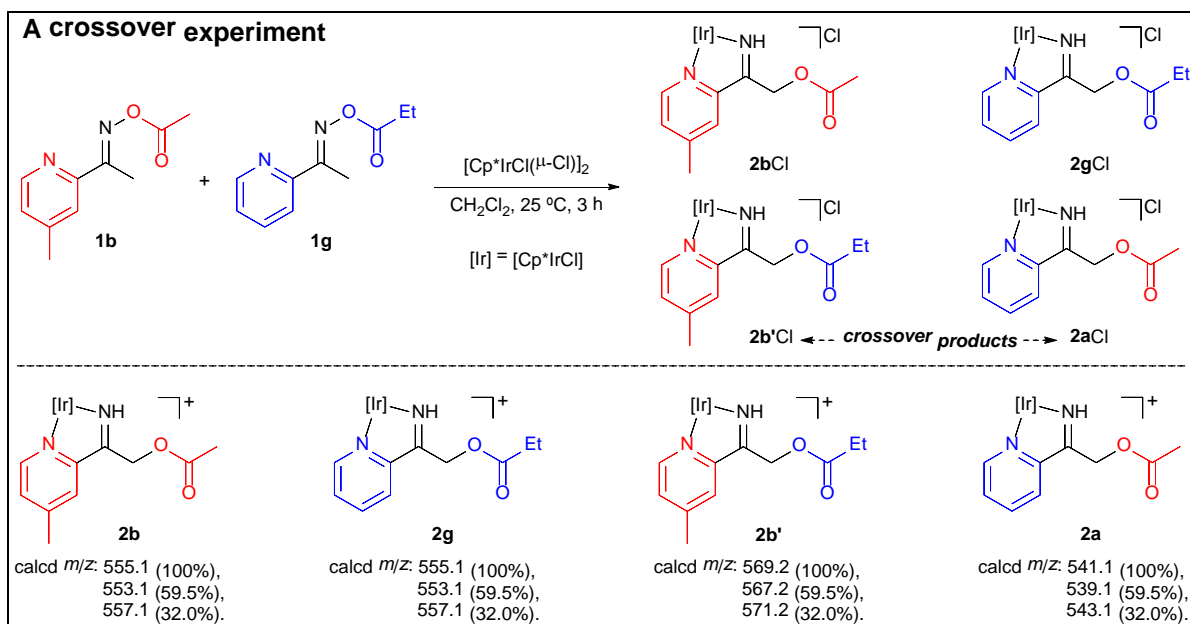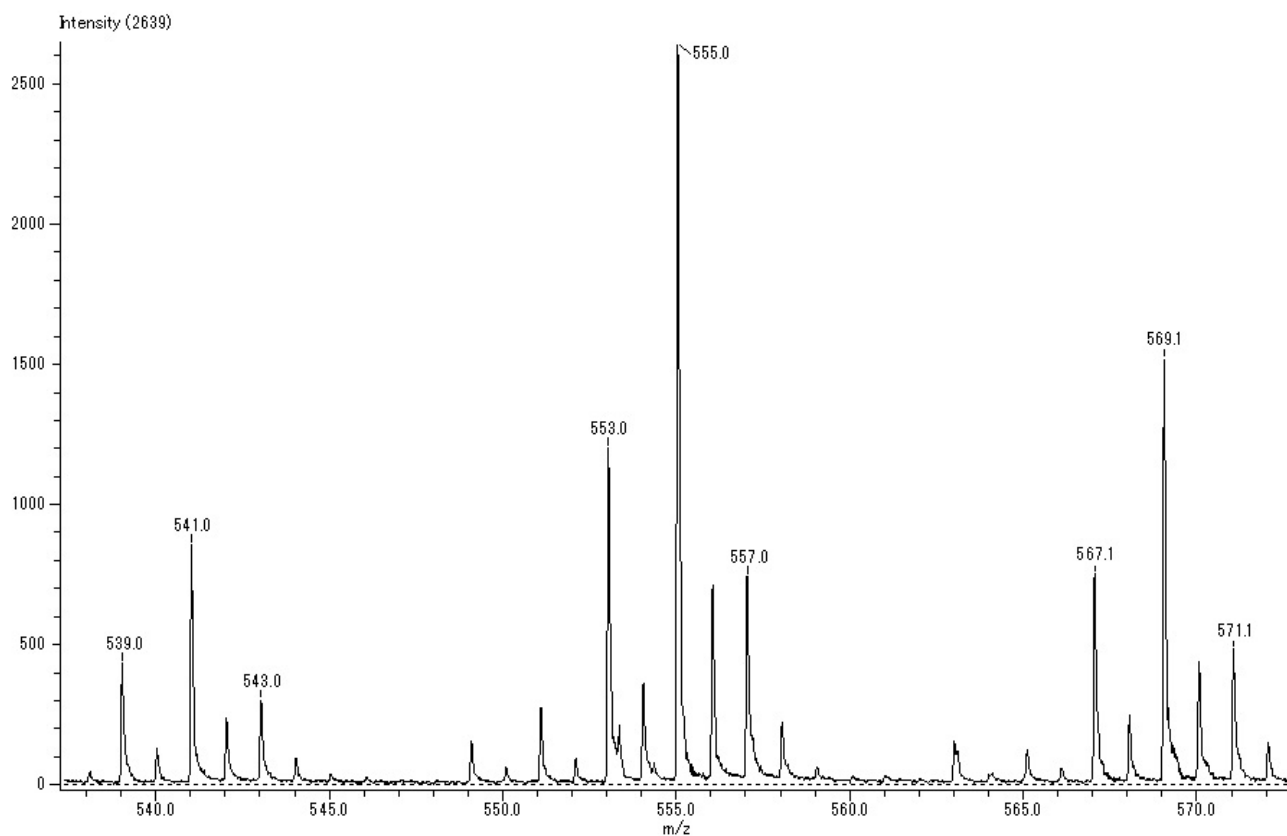

**Fig. S1. ESI-MS spectrum (positive ion mode) for the reaction mixture in Scheme 3 (A crossover experiment).**

## X-ray diffraction studies

Diffraction data were collected on a Rigaku VariMax Saturn CCD diffractometer with graphite monochromated Mo-K $\alpha$  radiation ( $\lambda = 0.71075 \text{ \AA}$ ) at  $-180 \text{ }^{\circ}\text{C}$ . Intensity data were corrected for Lorentz and polarization effects and for an empirical absorption.<sup>S1</sup> All calculations were performed using the *CrystalStructure*<sup>S2</sup> crystallographic software package except for refinements, which was performed using SHELXL-97.<sup>S3</sup> The structures were solved by direct methods (SIR-97 for **2a**BF<sub>4</sub><sup>S4</sup> and SIR-2011 for **4Cl**<sup>S5</sup>) and expanded using Fourier techniques. Non-hydrogen atoms were refined on  $F^2$  anisotropically by full-matrix least-squares techniques. Hydrogen atoms were placed at the calculated positions with fixed isotropic parameters. Details of the X-ray diffraction study are summarized in Table S1.

**Table S1. X-ray crystallographic data for 2aBF<sub>4</sub> and 4Cl.**

|                                                      | <b>2aBF<sub>4</sub></b>                                                           | <b>4Cl·CH<sub>3</sub>OH</b>                                                     |
|------------------------------------------------------|-----------------------------------------------------------------------------------|---------------------------------------------------------------------------------|
| CCDC                                                 | 1555548                                                                           | 1555549                                                                         |
| empirical formula                                    | C <sub>19</sub> H <sub>25</sub> BClF <sub>4</sub> IrN <sub>2</sub> O <sub>2</sub> | C <sub>19</sub> H <sub>29</sub> Cl <sub>2</sub> IrN <sub>2</sub> O <sub>2</sub> |
| formula weight                                       | 627.90                                                                            | 580.58                                                                          |
| dimension of crystals                                | 0.23×0.08×0.07                                                                    | 0.186×0.171×0.089                                                               |
| crystal system                                       | orthorhombic                                                                      | monoclinic                                                                      |
| space group                                          | P2 <sub>1</sub> 2 <sub>1</sub> 2 <sub>1</sub> (#19)                               | P2 <sub>1</sub> /c (#14)                                                        |
| <i>a</i> [Å]                                         | 7.5430(10)                                                                        | 11.7603(11)                                                                     |
| <i>b</i> [Å]                                         | 12.7445(17)                                                                       | 12.1239(12)                                                                     |
| <i>c</i> [Å]                                         | 22.732(3)                                                                         | 15.2286(15)                                                                     |
| $\alpha$ [°]                                         | 90.0000                                                                           | 90.0000                                                                         |
| $\beta$ [°]                                          | 90.0000                                                                           | 91.3973(15)                                                                     |
| $\gamma$ [°]                                         | 90.0000                                                                           | 90.0000                                                                         |
| <i>V</i> [Å <sup>3</sup> ]                           | 2185.2(6)                                                                         | 2170.7(4)                                                                       |
| <i>Z</i>                                             | 4                                                                                 | 4                                                                               |
| $\rho_{\text{calcd}}$ [g cm <sup>-3</sup> ]          | 1.908                                                                             | 1.776                                                                           |
| <i>F</i> (000)                                       | 1216                                                                              | 1136                                                                            |
| $\mu$ [cm <sup>-1</sup> ]                            | 63.005                                                                            | 64.289                                                                          |
| trans. factors range                                 | 0.444–0.643                                                                       | 0.362–0.564                                                                     |
| index ranges                                         | –9 ≤ <i>h</i> ≤ 9                                                                 | –15 ≤ <i>h</i> ≤ 13                                                             |
|                                                      | –16 ≤ <i>k</i> ≤ 12                                                               | –15 ≤ <i>k</i> ≤ 15                                                             |
|                                                      | –29 ≤ <i>l</i> ≤ 29                                                               | –19 ≤ <i>l</i> ≤ 19                                                             |
| no. rflns measured                                   | 17827                                                                             | 17299                                                                           |
| no. unique rflns                                     | 8521                                                                              | 8138                                                                            |
| <i>R</i> <sub>int</sub>                              | 0.0385                                                                            | 0.0330                                                                          |
| no. rflns ( <i>I</i> > 2σ( <i>I</i> ))               | 5000                                                                              | 4889                                                                            |
| no. params refined                                   | 271                                                                               | 347                                                                             |
| <i>R</i> 1 ( <i>I</i> > 2σ( <i>I</i> )) <sup>a</sup> | 0.0269                                                                            | 0.0253                                                                          |
| <i>R</i> (All cata)                                  | 0.0315                                                                            | 0.0296                                                                          |
| <i>wR</i> 2 (All cata) <sup>b</sup>                  | 0.0545                                                                            | 0.0622                                                                          |
| GOF <sup>c</sup>                                     | 0.994                                                                             | 1.098                                                                           |
| max diff peak/hole [e Å <sup>-3</sup> ]              | 1.70/–2.09                                                                        | 0.76/–2.15                                                                      |

<sup>a</sup>  $RI = \Sigma||F_o| - |F_c|| / \Sigma|F_o|$ . <sup>b</sup>  $wR2 = [\Sigma\{w(F_o^2 - F_c^2)^2\} / \Sigma w(F_o^2)^2]^{1/2}$ ,  $w = 1 / [\sigma^2 F_o^2 + (aP)^2 + bP]$  (*a* and *b* are constants suggested by the refinement program;  $P = [\max(F_o^2, 0) + 2F_c^2] / 3$ ). <sup>c</sup>GOF =  $[\Sigma w(F_o^2 - F_c^2)^2 / (N_{\text{obs}} - N_{\text{params}})]^{1/2}$ .



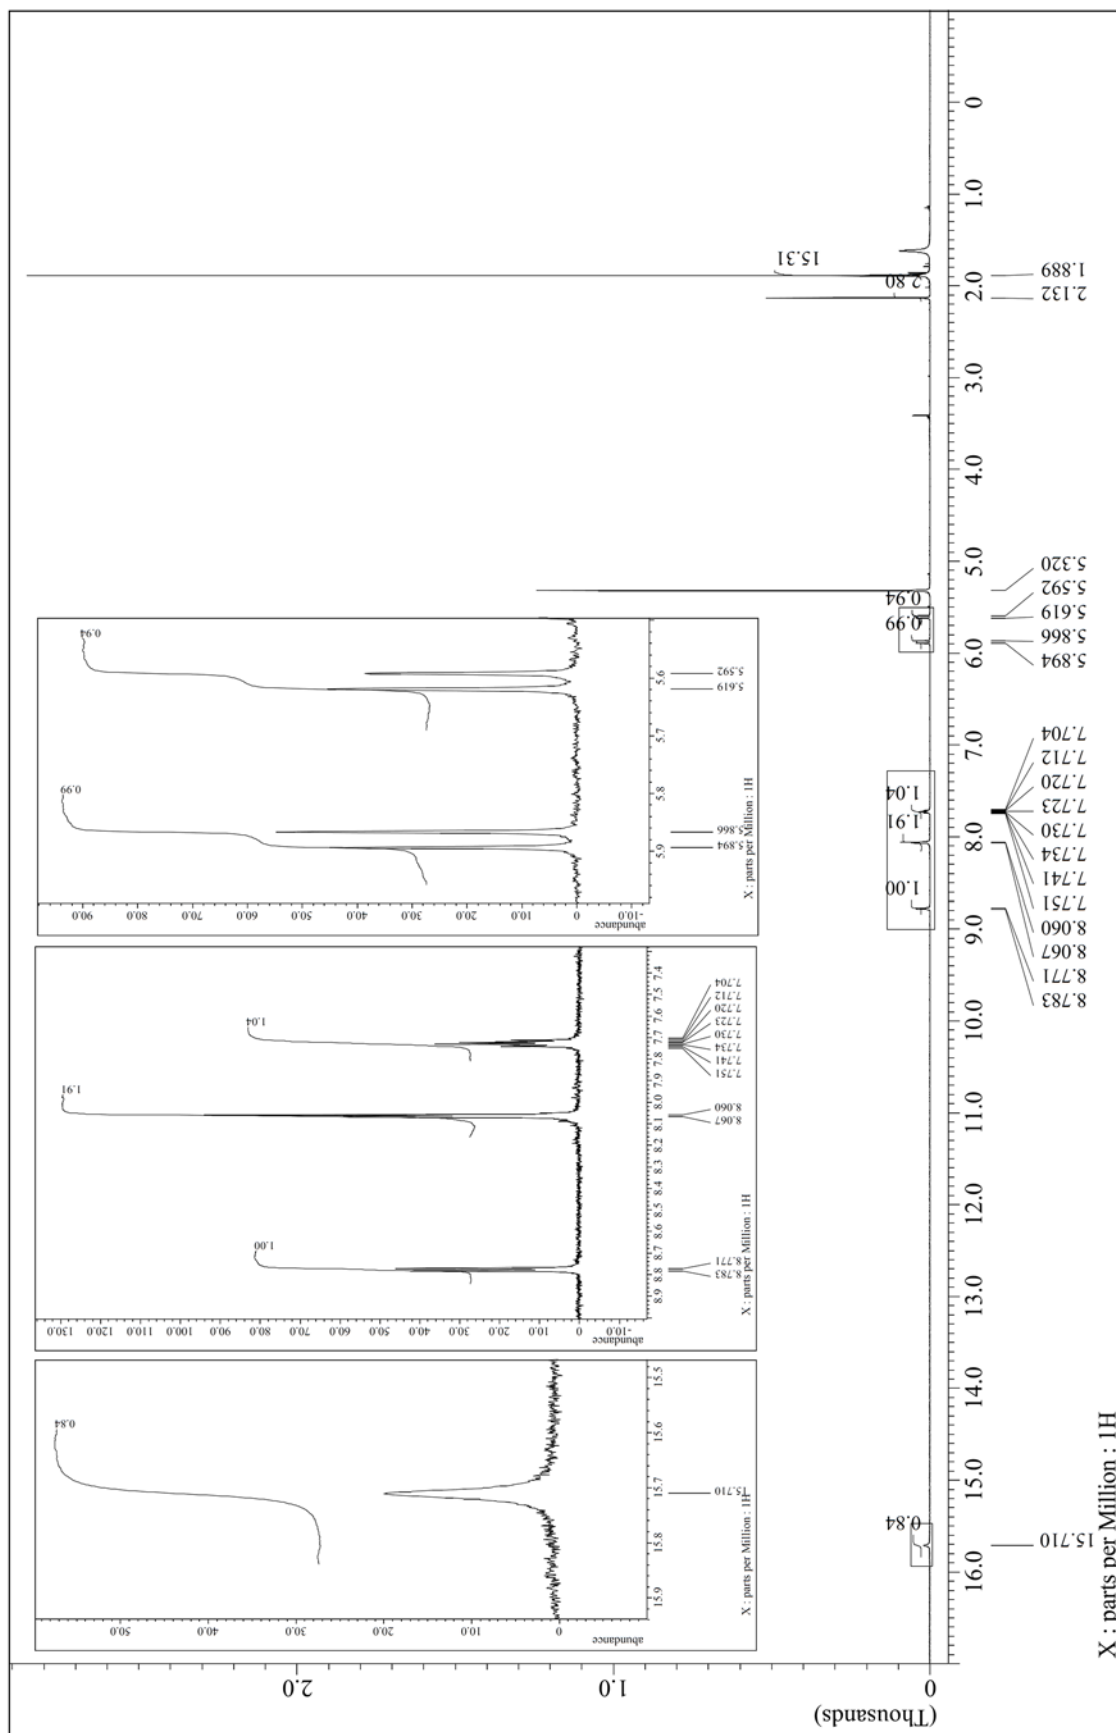

**Fig. S2. <sup>1</sup>H NMR (CD<sub>2</sub>Cl<sub>2</sub>) spectrum of 2aCl.**

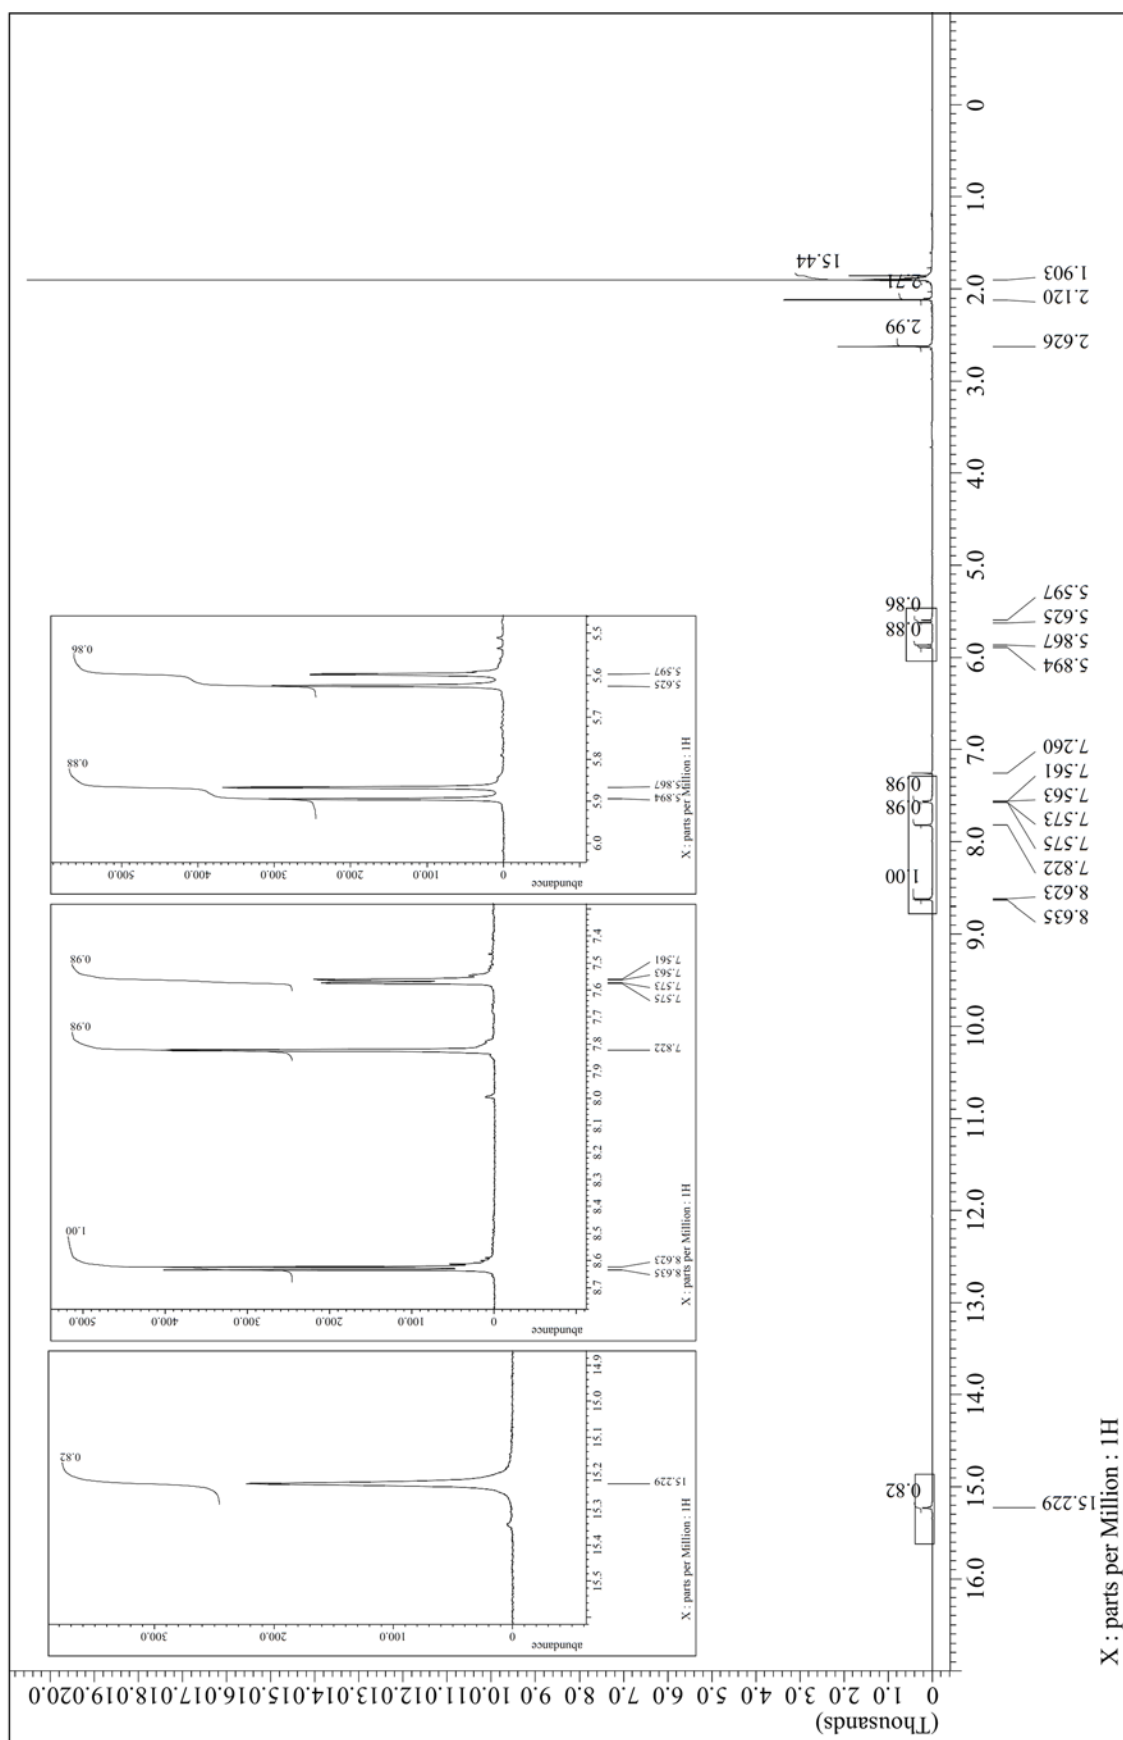

**Fig. S3.** <sup>1</sup>H NMR (CDCl<sub>3</sub>) spectrum of 2bCl.

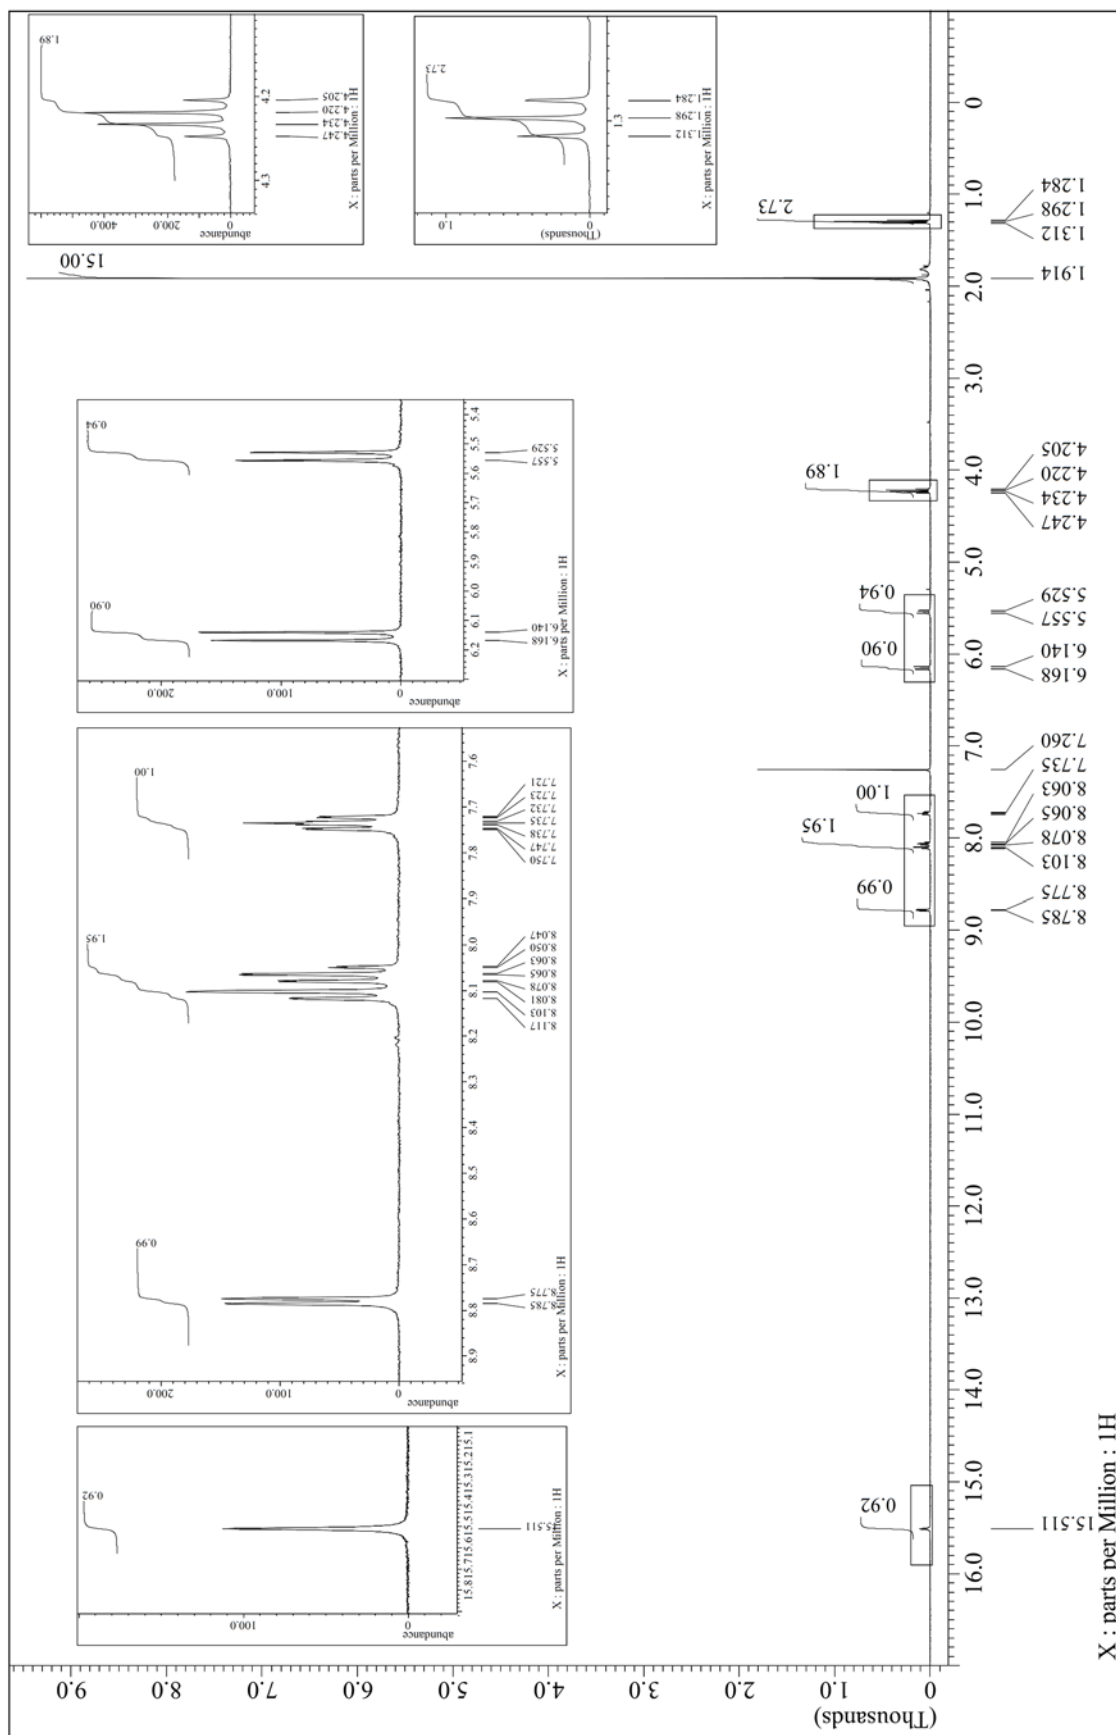

Fig. S4. <sup>1</sup>H NMR (CDCl<sub>3</sub>) spectrum of 2dCl.

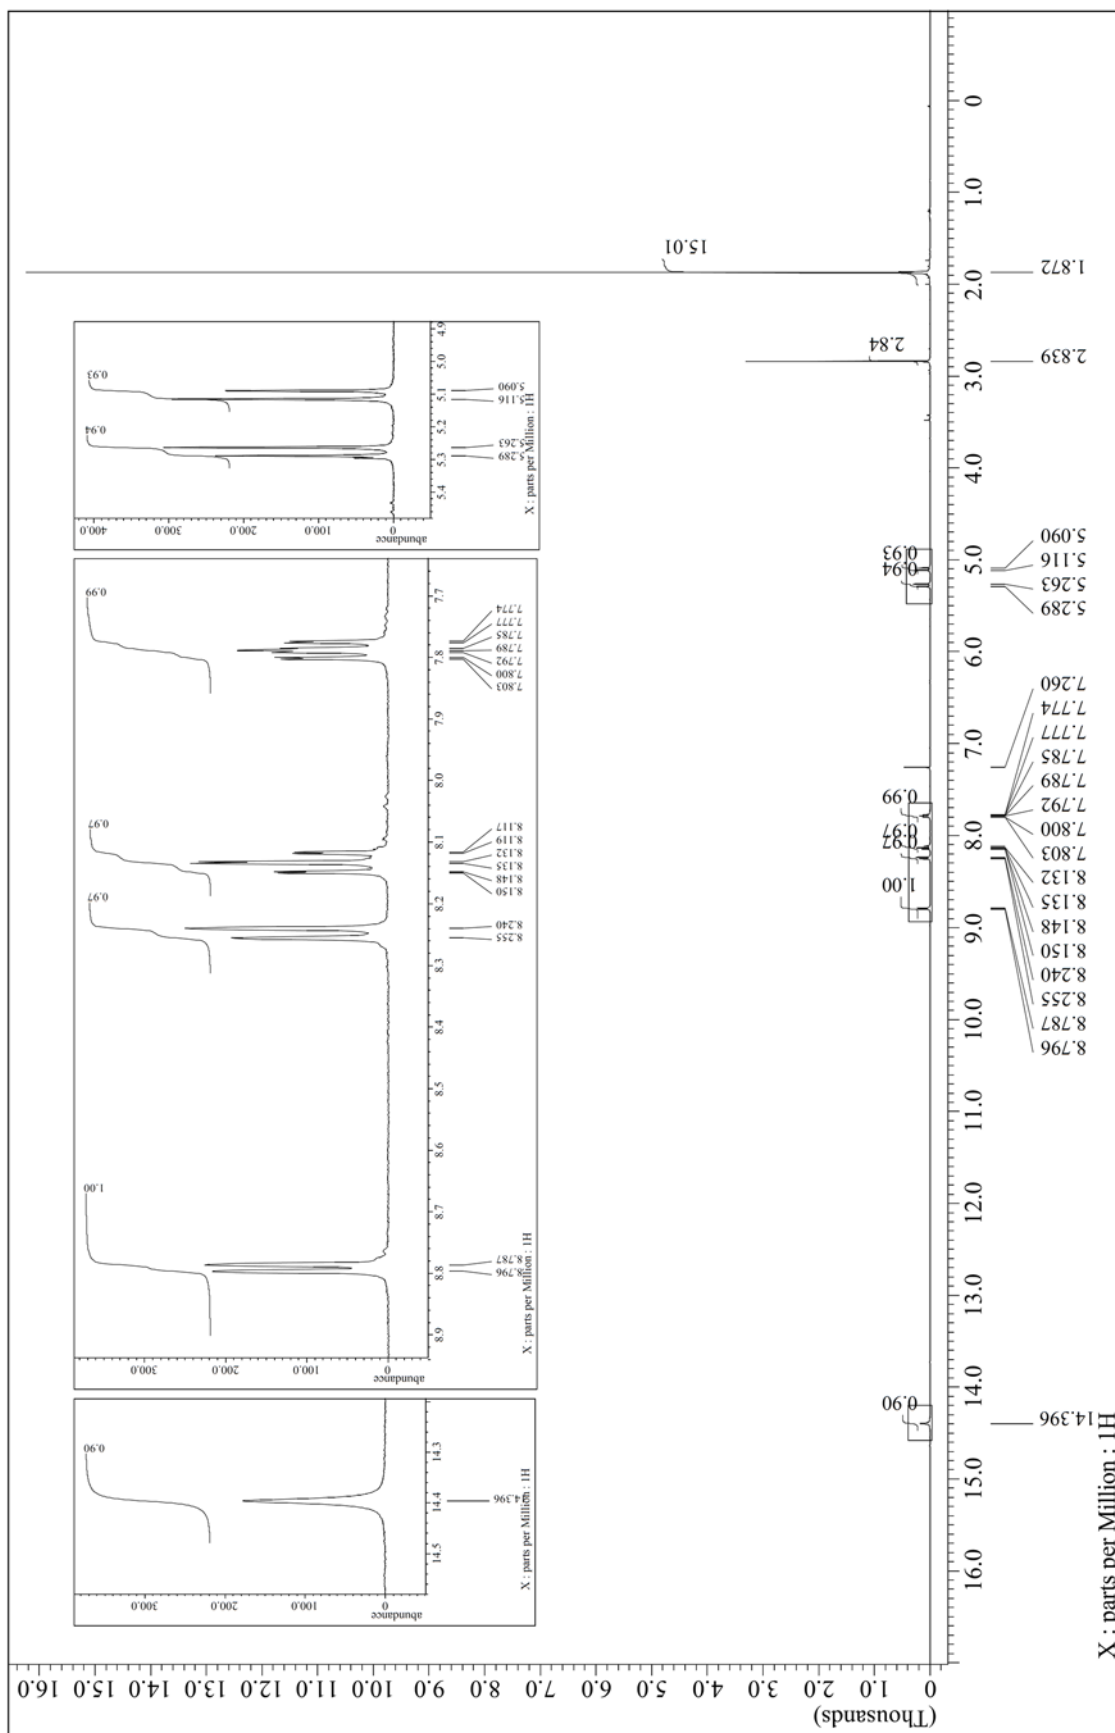

**Fig. S5. <sup>1</sup>H NMR (CDCl<sub>3</sub>) spectrum of 2eCl.**

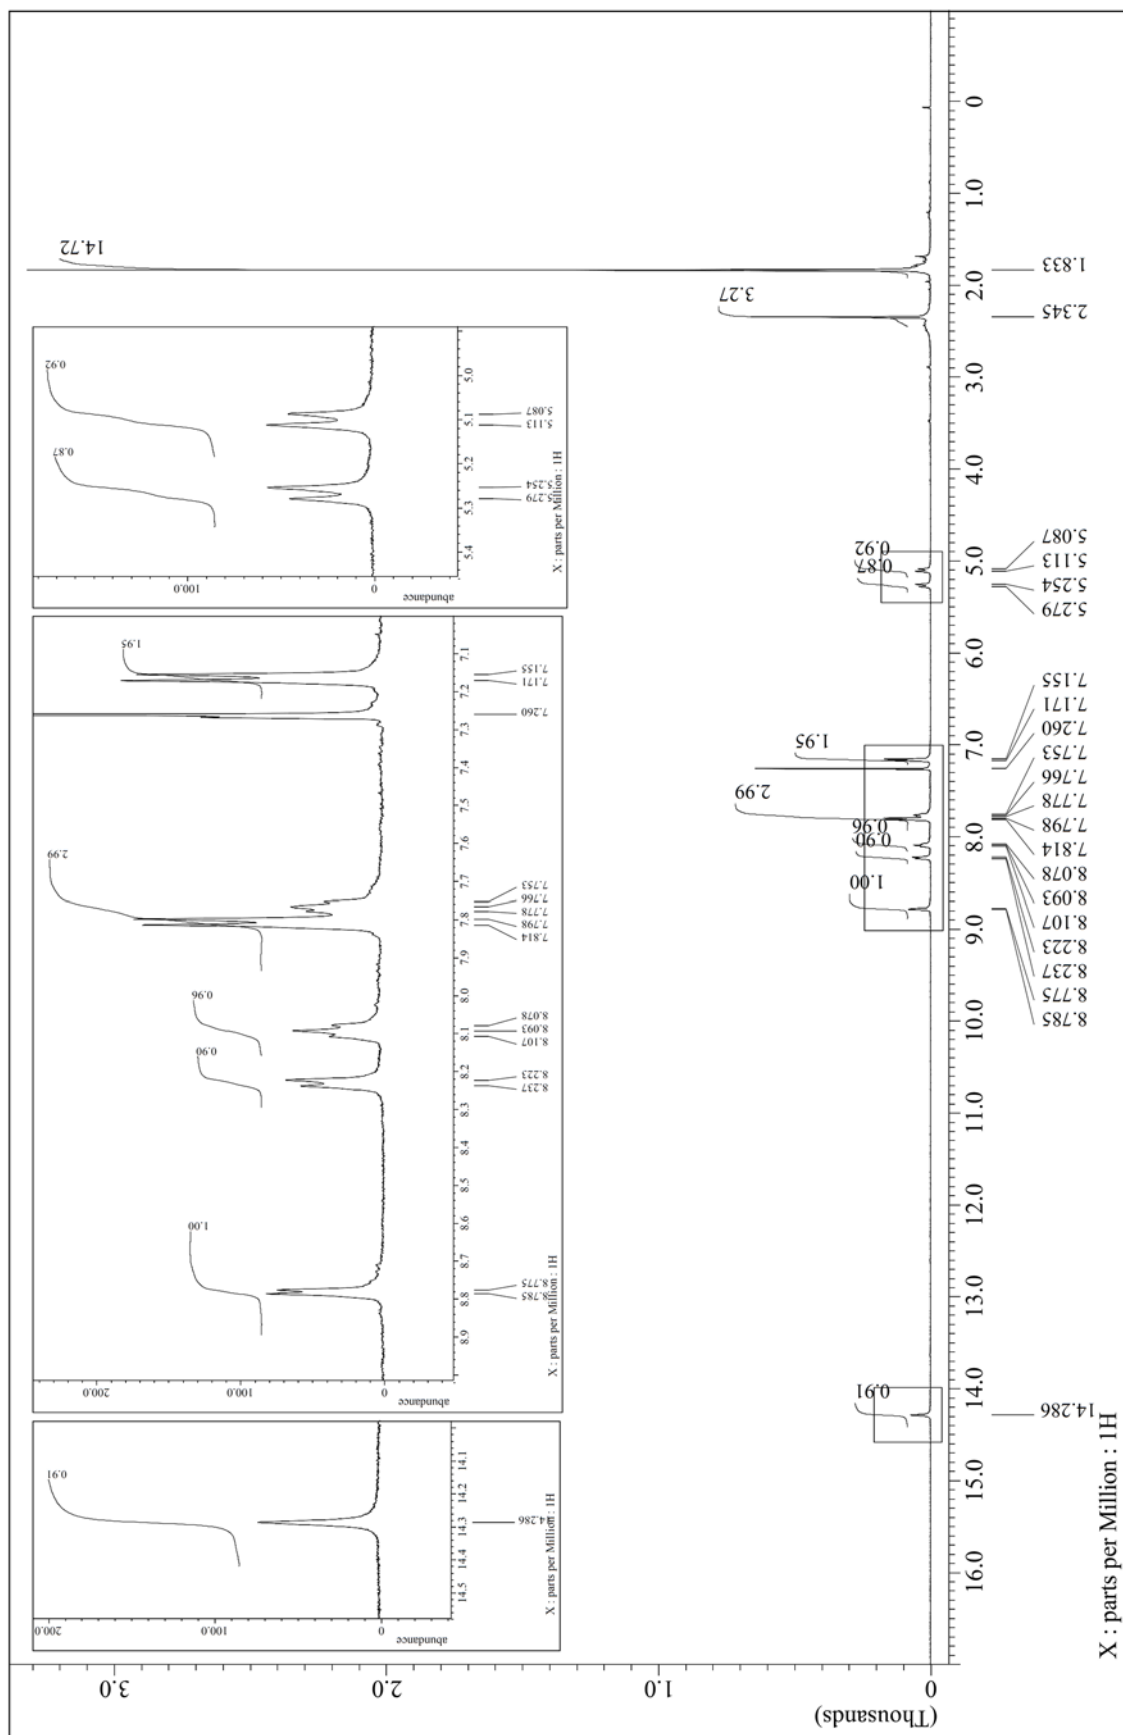

**Fig. S6.** <sup>1</sup>H NMR (CDCl<sub>3</sub>) spectrum of 2fCl.

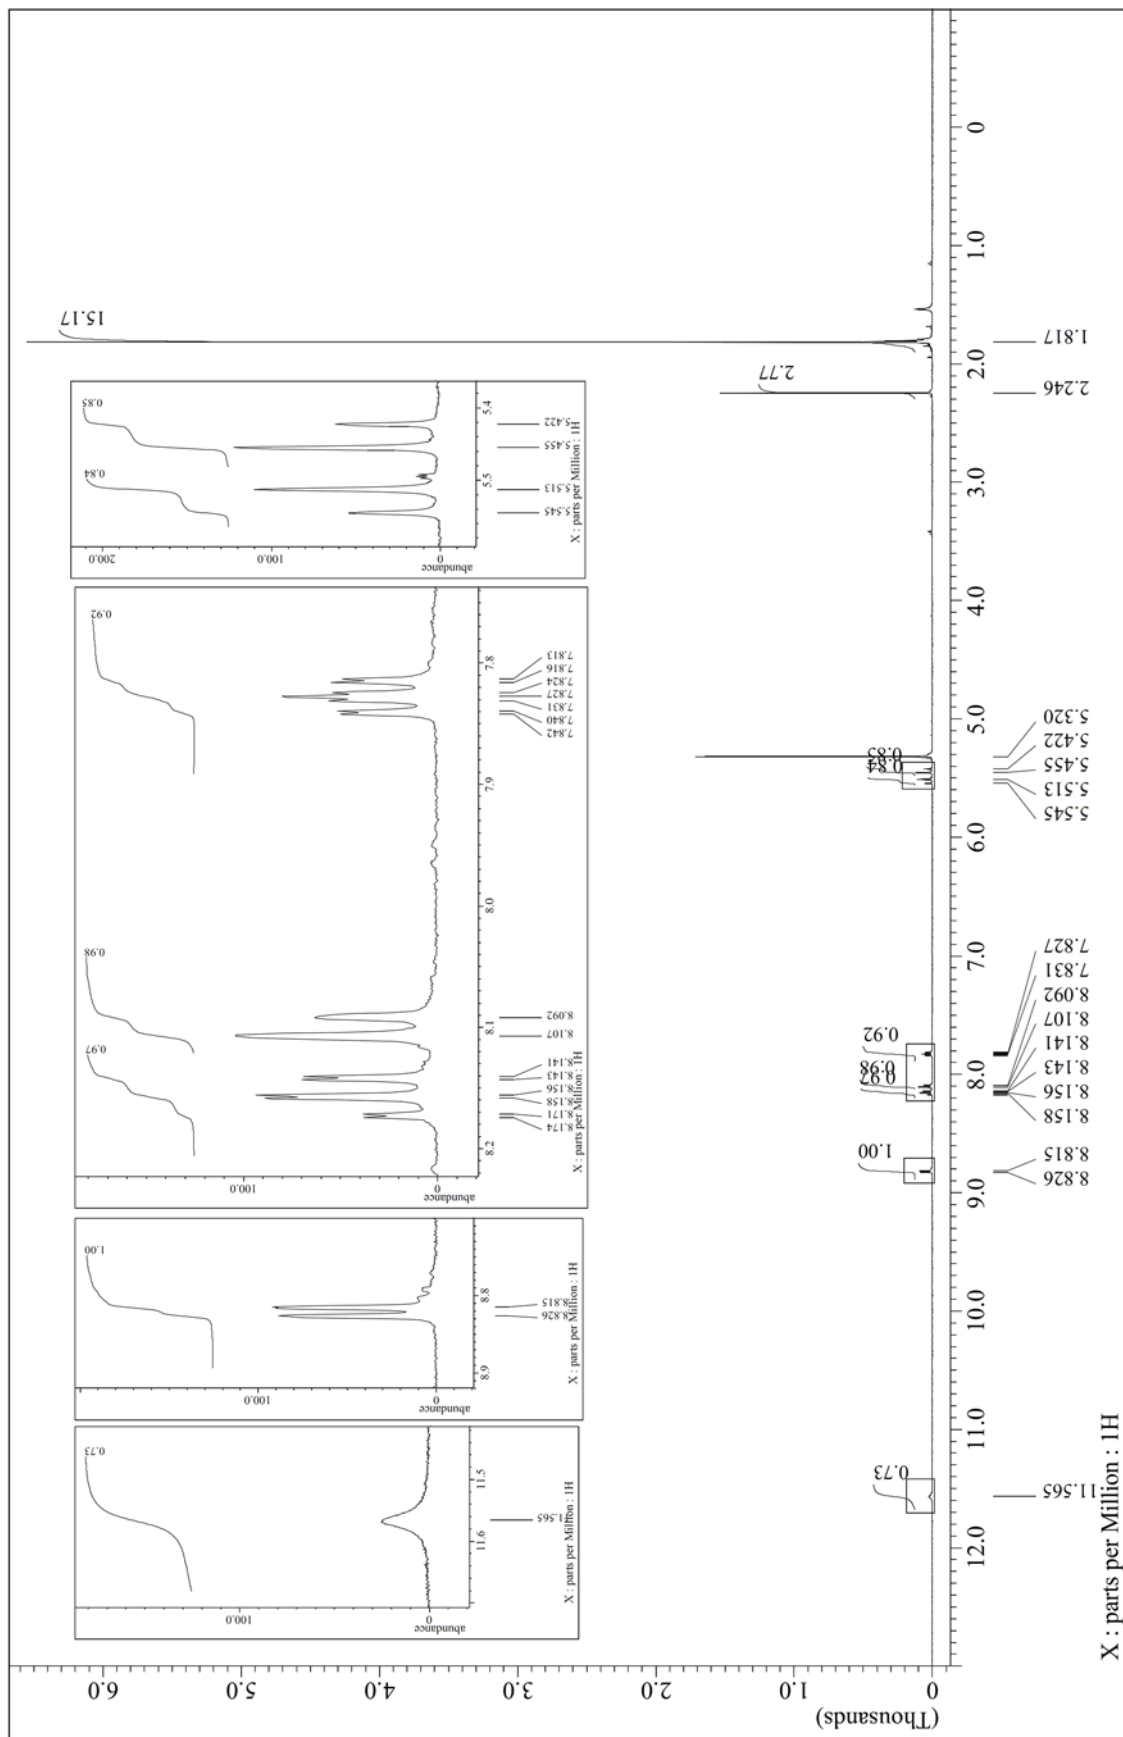

**Fig. S7. <sup>1</sup>H NMR (CD<sub>2</sub>Cl<sub>2</sub>) spectrum of 2aBF<sub>4</sub>.**

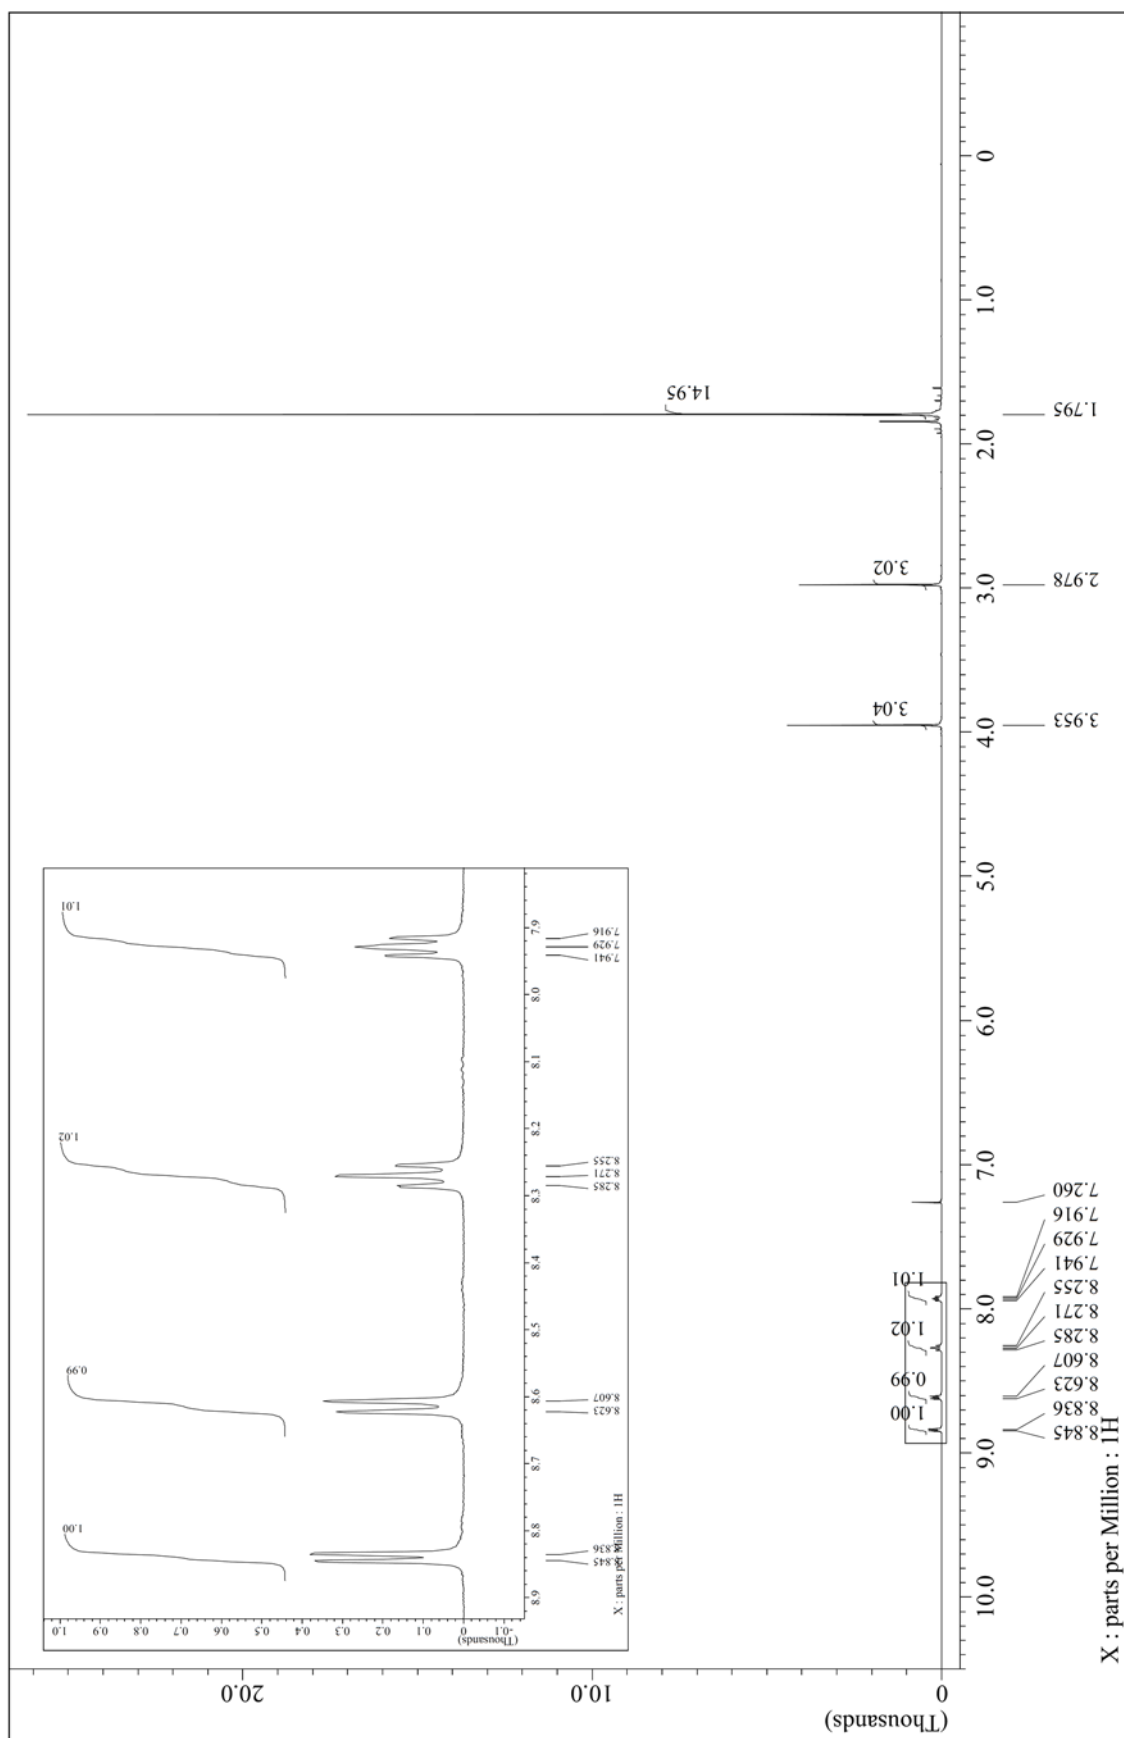

**Fig. S8.**  $^1\text{H}$  NMR ( $\text{CDCl}_3$ ) spectrum of 4Cl.

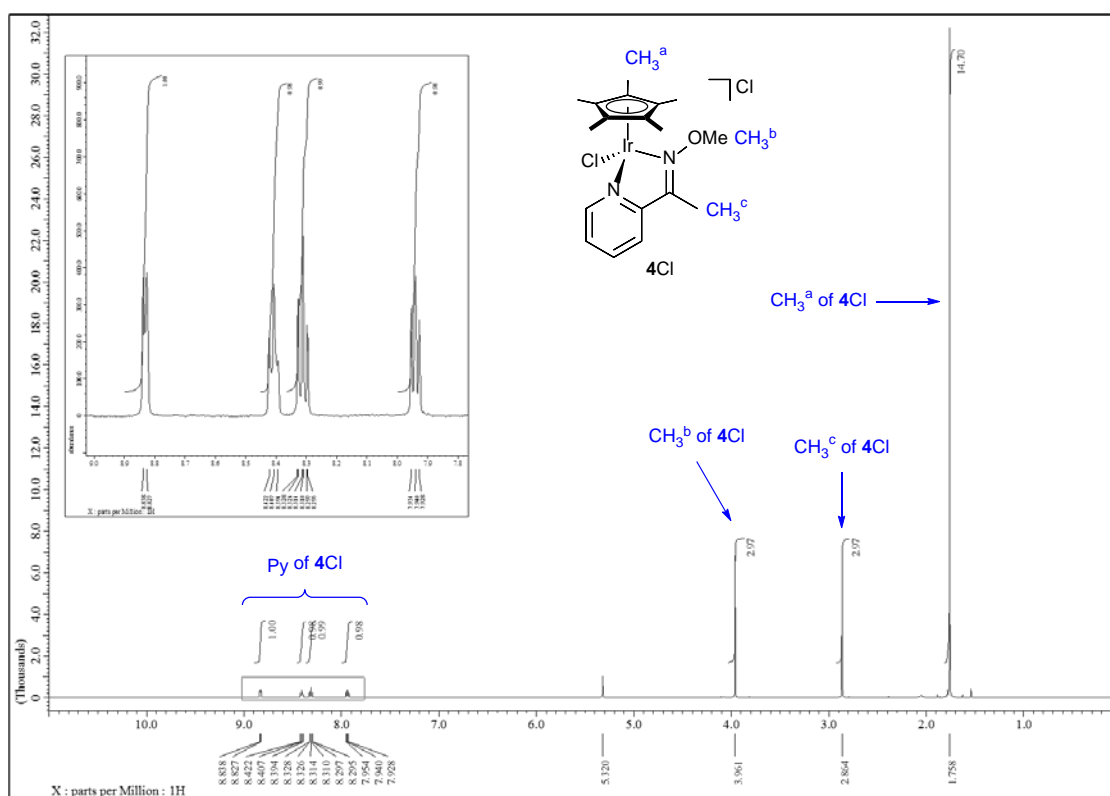

**Fig. S9.** Full  $^1\text{H}$  NMR ( $\text{CD}_2\text{Cl}_2\text{-D}_2\text{O}$ ) spectrum of **4Cl**.

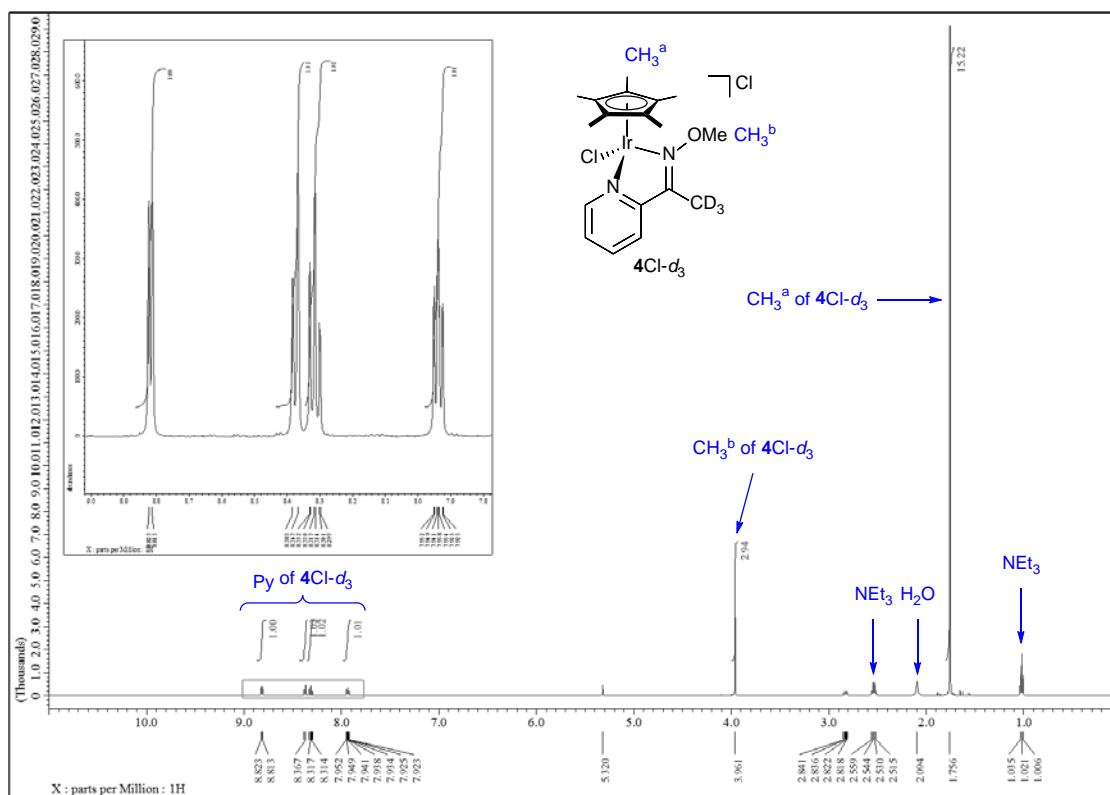

**Fig. S10.** Full  $^1\text{H}$  NMR ( $\text{CD}_2\text{Cl}_2\text{-D}_2\text{O-NEt}_3$ ) spectrum of **4Cl- $d_3$** .



## References

- (1) R. A. Jacobson, *REQAB: Private Communication to Rigaku Corporation*; Rigaku Corporation: Tokyo, Japan, 1998.
- (2) CrystalStructure 4.2.4: *Crystal Structure Analysis Package*; Rigaku Corporation: Tokyo, Japan, 2000–2016.
- (3) G. M. Sheldrick, *Acta Crystallogr., Sect. A*, 2008, **64**, 112–122.
- (4) A. Altomare, M. C. Burla, M. Camalli, G. L. Cascarano, C. Giacovazzo, A. Guagliardi, A. G. G. Moliterni, G. Polidori, R. Spagna, *J. Appl. Crystallogr.*, 1999, **32**, 115–119.
- (5) M. C. Burla, R. Caliendo, M. Camalli, B. Carrozzini, G. L. Cascarano, C. Giacovazzo, M. Mallamo, A. Mazzone, G. Polidori, R. Spagna, *J. Appl. Crystallogr.*, 2012, **45**, 357–361.
